# Supplementary material
Source: PubMed Central journal article supplement (PMC4208669)
Supplement: np5006168_si_001.pdf [file np5006168_si_001.pdf]

# Strain Prioritization for Natural Product Discovery by a High-Throughput Real-Time PCR Method

Hindra,<sup>1,‡</sup> Tingting Huang,<sup>1,‡</sup> Dong Yang,<sup>1,‡</sup> Jeffrey D. Rudolf,<sup>1,‡</sup> Pengfei Xie,<sup>1</sup> Guangbo Xie,<sup>1</sup> Qihui Teng,<sup>1</sup> Jeremy R. Lohman,<sup>1</sup> Xiangcheng Zhu,<sup>2,3</sup> Yong Huang,<sup>2</sup> Li-Xing Zhao,<sup>4</sup> Yi Jiang,<sup>4</sup> Yanwen Duan,<sup>2,3\*</sup> and Ben Shen<sup>1,5,6\*</sup>

<sup>1</sup>Department of Chemistry, The Scripps Research Institute, Jupiter, FL 33458, USA; <sup>2</sup>Xiangya International Academy of Translational Medicine, Central South University, Changsha, Hunan 410013, China; <sup>3</sup>Hunan Engineering Research Center of Combinatorial Biosynthesis and Natural Product Drug Discovery, Changsha, Hunan 410329, China; <sup>4</sup>Yunnan Institute of Microbiology, Yunnan University, Kunming, Yunnan 650091, China; <sup>5</sup>Department of Molecular Therapeutics, The Scripps Research Institute, Jupiter, FL 33458, USA; and <sup>6</sup>Natural Products Library Initiative, The Scripps Research Institute, Jupiter, FL 33458, USA.

<sup>‡</sup>These authors contributed equally

\*To whom correspondence should be addressed: Ben Shen, The Scripps Research Institute, 130 Scripps Way, #3A1, Jupiter, FL 33458; Tel: (561) 228-2456, Fax: (561) 228-2472; E-mail: [shenb@scripps.edu](mailto:shenb@scripps.edu) or Yanwen Duan, E-mail: [ywduan66@yahoo.com](mailto:ywduan66@yahoo.com)

## Supporting Information (SI)

|                   |                                                                                                             |     |
|-------------------|-------------------------------------------------------------------------------------------------------------|-----|
| <b>Table S1</b>   | Primers used in this study .....                                                                            | S2  |
| <b>Table S2</b>   | Strains and plasmids used in this study.....                                                                | S3  |
| <b>Figure S1</b>  | Primer design targeting the genes encoding the four diterpene-related synthases<br>T1, T2, T3, and T4 ..... | S4  |
| <b>Figure S2</b>  | T1, T2, T3, and T4 sequence analysis for primer design.....                                                 | S5  |
| <b>Figure S3</b>  | Sequence comparison of <i>T1</i> , <i>T2</i> , <i>T3</i> , and <i>T4</i> PCR hit fragments.....             | S7  |
| <b>Figure S4</b>  | Comparison of the PTM-PTN biosynthetic clusters .....                                                       | S15 |
| <b>Figure S5</b>  | Phylogeny, morphology, and genetic amenability of the new PTM-PTN producers.....                            | S16 |
| <b>Figure S6</b>  | HPLC analysis of PTM and PTN production by <i>S. platensis</i> spp. ....                                    | S17 |
| <b>Figure S7</b>  | Inactivation of <i>R1</i> to construct PTM-PTN overproducers .....                                          | S19 |
| <b>References</b> | .....                                                                                                       | S20 |

**Table S1.** Primers used in this study.

| Primer       | Nucleotide Sequence (5'-3')                                          | Function (Reference)                                             |
|--------------|----------------------------------------------------------------------|------------------------------------------------------------------|
| ptmn1-S      | CCGGGCTGGACATCCGGGCGGAC                                              | PCR targeting <i>ptm/ptnT1</i>                                   |
| ptmn1-AS     | GGATGGCGCAGAGCAGGAGGTC                                               | PCR targeting <i>ptm/ptnT1</i>                                   |
| ptmn2-S      | CTGCTCCCCCGCCGCCACC                                                  | PCR targeting <i>ptm/ptnT2</i>                                   |
| ptmn2-AS     | CGTAGTACGGCGAGGCGTGC                                                 | PCR targeting <i>ptm/ptnT2</i>                                   |
| ptm3-S       | TATCTGCTCGACGGCAGGCTCGAC                                             | PCR targeting <i>ptmT3</i>                                       |
| ptm3-AS      | TTGGCCCAGGTCCGCAGATCGTT                                              | PCR targeting <i>ptmT3</i>                                       |
| ptmnT4mix-S  | CTGBTSCACGACGAYVTSATGGAC                                             | PCR targeting <i>ptm/ptnT4</i>                                   |
| ptmnT4mix-AS | GCCSAKBABGTCGTCSTRYVWDYTGGAA                                         | PCR targeting <i>ptm/ptnT4</i>                                   |
| 16SrRNA_for  | AGAGTTTGATCCTGGCTCAG                                                 | Phylogenetic Analysis                                            |
| 16SrRNA_rev  | ACGGCTACCTTGTACGACTT                                                 | Phylogenetic Analysis                                            |
| recAfor      | TAATACGACTCACTATAGGGCCGCRCTC<br>GCACARATTGAACG                       | Phylogenetic Analysis                                            |
| recArev      | GCTAGTTATTGCTCAGCGGCGTCGGGGT<br>TGTCCTTSAGGAAG                       | Phylogenetic Analysis                                            |
| rpoB-2       | CATCGACCACTTCGGCAAC                                                  | Phylogenetic Analysis                                            |
| ActRpoB3303R | GAANCGCTGDCCRCCGAAGTG                                                | Phylogenetic Analysis <sup>1</sup>                               |
| trpBfor      | TAATACGACTCACTATAGGGGCGCGAGG<br>ACCTGAACCACAC                        | Phylogenetic Analysis                                            |
| trpBrev      | GCTAGTTATTGCTCAGCGGCATGGCCGG<br>GATGATGCCC                           | Phylogenetic Analysis                                            |
| ptmT1for     | GACATCGAGGGGCATGGGAAGG                                               | Sequencing                                                       |
| ptmT1rev     | GTCAATCCGGAGACCGGGGTAC                                               | Sequencing                                                       |
| ptmT2for     | CTTGTGGGCGTCCAGGAAGGAG                                               | Sequencing                                                       |
| ptmT2rev     | CCACGAACGACAACAACAGTTGCG                                             | Sequencing                                                       |
| ptmT2mid     | GATGTGTGCGTTGGTGCTGG                                                 | Sequencing                                                       |
| ptmT3for     | CATCTGGCGCGACAACCGCATTG                                              | Sequencing                                                       |
| ptmT3rev     | CATCGCGTCCTTTGATCGGGAGG                                              | Sequencing                                                       |
| ptmT4for2    | CGGAACACCGCCGCGTAG                                                   | Sequencing                                                       |
| ptmT4rev     | GAGCACCACGTCGCCGTG                                                   | Sequencing                                                       |
| ptmR1for     | GTCTTCGGCAGCCGGCTCTC                                                 | Sequencing                                                       |
| ptmR1rev     | CGACTCAACAGGGCGTAAAGGTGC                                             | Sequencing                                                       |
| ptmRtgtF     | CCCGCCGGAATCGGCCCTGATGGAGCAG<br>TTCGGCATTTCATTCCGGGGATCCGTC<br>GACC  | $\lambda$ RED-mediated PCR targeting replacement of <i>ptmR1</i> |
| ptmRtgtR     | TCGAGGAGTTCCAGACGGGTATTGGCGC<br>CGCTCGCATTCAATGTAGGCTGGAGCTG<br>CTTC | $\lambda$ RED-mediated PCR targeting replacement of <i>ptmR1</i> |
| ptmRidF      | CCTGATGGAGCAGTTCGG                                                   | $\Delta$ <i>ptmR1</i> PCR confirmation                           |
| ptmRidR      | GGAGTTCCAGACGGGTATTG                                                 | $\Delta$ <i>ptmR1</i> PCR confirmation                           |

**Table S2.** Strains and plasmids used in this study.

| Strain/Plasmid                 | Genotype, Description                                                                                                                       | Source (Reference)   |
|--------------------------------|---------------------------------------------------------------------------------------------------------------------------------------------|----------------------|
| <i>E. coli</i> DH5 $\alpha$    | <i>E. coli</i> host for cloning                                                                                                             | Life Technologies    |
| <i>E. coli</i> XL1-Blue MRF'   | <i>E. coli</i> host for library construction                                                                                                | Agilent              |
| <i>E. coli</i> ET12567/pUZ8002 | Methylation-deficient <i>E. coli</i> host for intergeneric conjugation; contains pUZ8002, a nontransmissible <i>oriT</i> mobilizing plasmid | 2                    |
| <i>E. coli</i> BW25113/pIJ790  | <i>E. coli</i> host for PCR targeting                                                                                                       | 3                    |
| <i>S. platensis</i> MA7327     | Wildtype PTM/PTN producer                                                                                                                   | Merck <sup>4,5</sup> |
| <i>S. platensis</i> MA7339     | Wildtype PTN producer                                                                                                                       | Merck <sup>6,7</sup> |
| <i>S. platensis</i> SB12001    | PTM/PTN overproducing strain                                                                                                                | 8                    |
| <i>S. platensis</i> SB12002    | PTM/PTN overproducing strain                                                                                                                | 8                    |
| <i>S. platensis</i> SB12600    | PTN overproducing strain                                                                                                                    | 9                    |
| <i>S. platensis</i> CB00739    | PTM-PTN strain hit                                                                                                                          | This study           |
| <i>S. platensis</i> CB00765    | PTM-PTN strain hit                                                                                                                          | This study           |
| <i>S. platensis</i> CB00775    | PTM-PTN strain hit                                                                                                                          | This study           |
| <i>S. platensis</i> CB00789    | PTM-PTN strain hit                                                                                                                          | This study           |
| <i>S. platensis</i> CB02289    | PTM-PTN strain hit                                                                                                                          | This study           |
| <i>S. platensis</i> CB02304    | PTM-PTN strain hit                                                                                                                          | This study           |
| <i>S. platensis</i> SB12026    | CB00739 with <i>ptmR1</i> replaced with <i>aac(3)IV+oriT</i> cassette                                                                       | This study           |
| <i>S. platensis</i> SB12027    | CB00765 with <i>ptmR1</i> replaced with <i>aac(3)IV+oriT</i> cassette                                                                       | This study           |
| <i>S. platensis</i> SB12028    | CB00775 with <i>ptmR1</i> replaced with <i>aac(3)IV+oriT</i> cassette                                                                       | This study           |
| SuperCos1                      | Vector for the construction of cosmid libraries                                                                                             | Agilent              |
| pIJ773                         | Plasmid containing the apramycin resistance cassette ( <i>aac(3)IV+oriT</i> )                                                               | 3                    |
| pBS12031                       | Cosmid 18H9 from CB00739 cosmid library, containing partial <i>ptm</i> gene cluster                                                         | This study           |
| pBS12032                       | Cosmid 18H10 from CB00765 cosmid library, containing partial <i>ptm</i> gene cluster                                                        | This study           |
| pBS12033                       | Cosmid 10F8 from CB00775 cosmid library, containing partial <i>ptm</i> gene cluster                                                         | This study           |
| pBS12034                       | pBS12031 with <i>ptmR1</i> replaced with <i>aac(3)IV+oriT</i> by PCR targeting                                                              | This study           |
| pBS12035                       | pBS12032 with <i>ptmR1</i> replaced with <i>aac(3)IV+oriT</i> by PCR targeting                                                              | This study           |
| pBS12036                       | pBS12033 with <i>ptmR1</i> replaced with <i>aac(3)IV+oriT</i> by PCR targeting                                                              | This study           |

**Figure S1.** Genetic organization of the PTM-PTN dual biosynthetic gene cluster in *S. platensis* MA7327 and the PTN biosynthetic gene cluster in *S. platensis* MA7339, and primer design targeting the genes encoding the four diterpene-related synthases *ent*-atiserene synthase (T1), *ent*-copalyl diphosphate synthase (T2), *ent*-kaurene synthase (T3), and geranylgeranyl diphosphate synthase (T4).<sup>10</sup> Black arrows depicting the relative locations of the primers with the predicted sizes for each of the products indicated.

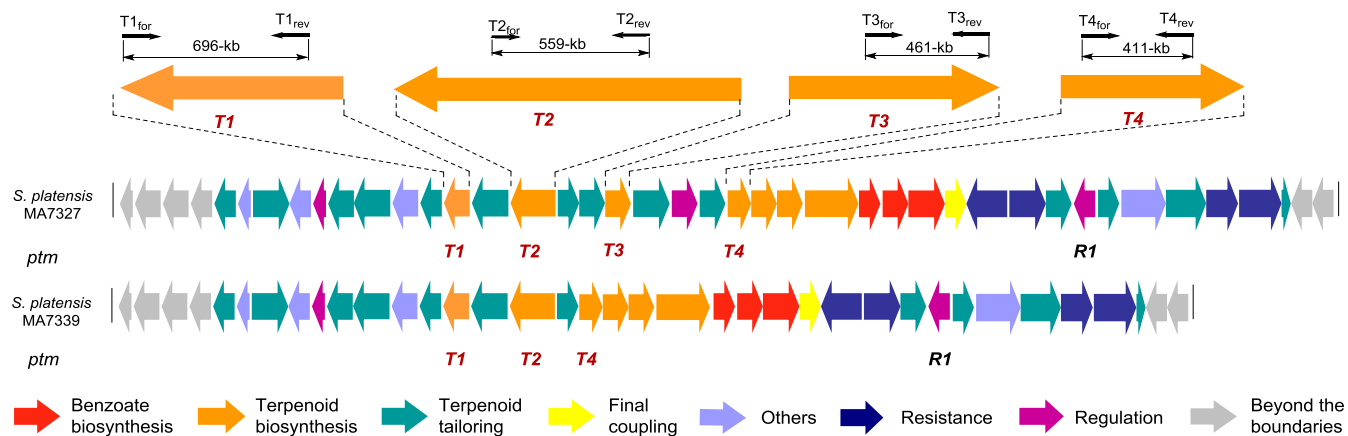

**Figure S2.** T1, T2, T3, and T4 sequence analysis for primer design. **(a)** T1, **(b)** T2, **(c)** T3, and **(d)** T4. For T1, T2, and T4, amino acid sequences were aligned using Clustal 2<sup>11</sup> and conserved sequences were highlighted using Boxshade. Consensus sequences highlighted in black were chosen for primer design, which was based on the associated nucleotide sequences. Accession codes of proteins used in the alignment: PtmT1 (ACO31274), PtnT1 (ADD83014), Sko3988\_Orf2 (BAD86797), Swt1.2 (AEV45183), Swt2.2 (AEW22921), PtmT2 (ACO31276), PtnT2 (ADD83015), PtmT3 (ACO31279), PtmT4 (ACO31283), PtnT4 (ADD83016), Kgris\_Orf1 (BAB07816), PlaT4 (ABB69754), Bra2 (BAG16276), and Sko3988\_Orf4 (BAD86799).

**a**

|           |    |                                                                |                                  |
|-----------|----|----------------------------------------------------------------|----------------------------------|
| PtmT1     | 61 | IVAIISQNPLNAGLDIRADTHTSGK... (200) ... RKHSLSLAMGGDLLLCAIPLLAL | 308                              |
| PtnT1     | 61 | IVAIISQNPLNAGLDIRADTHTSGK... (200) ... RKHSLSLAMGGDLLLCAIPLLAL | 308                              |
| consensus | 61 | *****<br>Sense primer region                                   | *****<br>Antisense primer region |

Sense primer region:

|                    |     |                                    |                                   |
|--------------------|-----|------------------------------------|-----------------------------------|
| Conserved residues |     | <b>G L D I R A D</b>               |                                   |
| ptmT1              | 181 | ATCGTCGCGATCATCTCCCAGAACCCGCTCAACG | <b>CCGGGCTGGACATCCGGGCGGACACC</b> |
| ptnT1              | 181 | ATCGTCGCGATCATCTCCCAGAACCCGCTCAACG | <b>CCGGGCTGGACATCCGGGCGGACACC</b> |
|                    |     | <b>CCGGGCTGGACATCCGGGCGGAC</b>     |                                   |

Antisense primer region:

|                    |     |                               |                                                 |
|--------------------|-----|-------------------------------|-------------------------------------------------|
| Conserved residues |     | <b>D L L L C A I</b>          |                                                 |
| ptmT1              | 868 | CTCTCGCTGGCGATGGGCGGG         | <b>GACCTCCTGCTCTGCGCCATCC</b> CGCTGCTCGCGCTCTGA |
| ptnT1              | 868 | CTCTCGCTGGCGATGGGCGGG         | <b>GACCTCCTGCTCTGCGCCATCC</b> CGCTGCTCGCGCTCTGA |
|                    |     | <b>GACCTCCTGCTCTGCGCCATCC</b> |                                                 |

**b**

|              |     |                                                              |                                    |
|--------------|-----|--------------------------------------------------------------|------------------------------------|
| Sko3988_Orf2 | 197 | GGAVGASPAATSAW... (153) ... GWLVEQQQPDGRWMDKWHASPPYYATACGAA  | 393                                |
| Swt2.2       | 196 | GGAVGASPAATAAW... (153) ... GWLVEQQQEPDGRWMDKWHASPPYYATACGAA | 392                                |
| Swt1.2       | 211 | GGAVGASPAATAAW... (153) ... DWLVDQQEPDGRWMDKWHASPPYYATACGAA  | 407                                |
| PtmT2        | 219 | NGSVGCSPAATAAW... (154) ... DWLLDNQLPDGSWMDKWHASPPYYATACCAL  | 416                                |
| PtnT2        | 219 | NGSVGCSPAATAAW... (154) ... DWLLDNQLPDGSWMDKWHASPPYYATACCAL  | 416                                |
| consensus    | 231 | ***.*****.<br>Sense primer region                            | ***** *<br>Antisense primer region |

Sense primer region:

|                    |     |                                                                |  |
|--------------------|-----|----------------------------------------------------------------|--|
| Conserved residues |     | <b>S P A A T</b>                                               |  |
| sko3988_orf2       | 603 | AGCCT <b>TCCCCGCGCCACC</b> TCCGCCTGGCTGGGCGATCCGCCTCATACGGACGC |  |
| swt2_orf2          | 600 | AGCCT <b>TCCCCGCGCCACC</b> GCCGCCTGGCTGGGCGATCCGCCGCACACGGACGC |  |
| swt1_orf2          | 645 | TGCC <b>TCCCCGCGCCACC</b> GCCGCCTGGCTGGGCGAACCGCCGCACACGGACGC  |  |
| ptmT2              | 669 | CTGC <b>TCCCCGCGCCACC</b> GCCGCCTGGCTGGGCGCCTCGCCCATCCGGCCGC   |  |
| ptnT2              | 669 | CTGC <b>TCCCCGCGCCACC</b> GCCGCCTGGCTGGGCGCCTCGCCCATCCGGCCGC   |  |
|                    |     | <b>CGCTCCCCGCGCCACC</b>                                        |  |

Antisense primer region:

|                    |      |                                      |                            |
|--------------------|------|--------------------------------------|----------------------------|
| Conserved residues |      | <b>H A S P Y Y</b>                   |                            |
| sko3988_orf2       | 1106 | AGCAGCAGCCGGACGGCCGGTGGATGGACAAGTGG  | <b>CACGCCTCTCCGTACTACG</b> |
| swt2_orf2          | 1103 | AGCAGGAGCCGGACGGCCGGTGGATGGACAAGTGG  | <b>CACGCCTCTCCGTACTACG</b> |
| swt1_orf2          | 1148 | AGCAGGAGCCGGACGGCCGCTGGATGGACAAGTGG  | <b>CACGCCTCCCCGTACTACG</b> |
| ptmT2              | 1175 | ACCAGCTGCCCCGACGGCAGCTGGATGGACAAGTGG | <b>CACGCCTCGCCGTACTACG</b> |
| ptnT2              | 1175 | ACCAGCTGCCCCGACGGCAGCTGGATGGACAAGTGG | <b>CACGCCTCGCCGTACTACG</b> |
|                    |      | <b>GCACGCCTCGCCGTACTACG</b>          |                            |

**Figure S2. (continued)**

**c**

PtmT3 73 L Y L L D G R L D ... (137) ... A N D L R T W A K 227  
 217 ctctatctgctcgacggcaggctcgac... (411) ... gccaacgatctgctggacctgggccaag  
 Sense primer region Antisense primer region

**d**

|              |     |                                   |                           |     |
|--------------|-----|-----------------------------------|---------------------------|-----|
| PtmT4        | 96  | LVHNFSLHDDVMDRDLERR... (106) ...  | FGMHLGMAFQLVDDVVGWGDPAVT  | 246 |
| PtnT4        | 96  | LVHNFSLHDDVMDHDLERR... (106) ...  | FGMHLGMAFQLVDDVVGWGDPAVT  | 246 |
| Kgris_Orf1   | 96  | LVHNFSLHDDVMDGDLERR... (106) ...  | FGWHLGMAFQLVDDVVGWGDPAAT  | 246 |
| PlaT4        | 106 | MIHNFSLIHDDVMDGDRERR... (106) ... | FGWHLGMAFQLVDDVVGWGDPAAT  | 256 |
| Bra2         | 77  | YLHVATLVHDDIIDGDLRR... (112) ...  | FADHLGCAFQMRDDLPLYLADTSRA | 233 |
| Sko3988_Orf4 | 120 | LFHAFTLIHDDVMDASDTRR... (122) ... | YALPIGEAFQLRDDLLGVFGDPSKT | 286 |
| consensus    | 121 | ..*...*.*.*.*.*...**              | .....*.*.*.*.*.*.....*    |     |

Sense primer region Antisense primer region

Sense primer design:

|                    |     |                                     |                             |
|--------------------|-----|-------------------------------------|-----------------------------|
| Conserved residues |     |                                     | L X H D D V/I M/I D         |
| ptmT4              | 271 | GCCGCGCCGTCGAACTGGTCCACAACCTTCTCG   | CTGTTGCACGACGACGTCATGGACCGC |
| ptnT4              | 271 | GCCGCGCCGTCGAACTCGTCCACAACCTTCTCG   | CTGTTGCACGACGACGTCATGGACCAC |
| kgris_orf1         | 270 | GCCGTCGCGGTTCGAGTTGGTGCACAACCTTCTCC | CTGCTCCACGACGACGTCATGGACGGT |
| plaT4              | 279 | GGCGCCGCGTGGAGATGATCCATAACCTTCTCT   | CTCATCCACGACGACGTCATGGACGGT |
| bra2               | 204 | GCGGTGGCGCTGGAGTACCTGCACGTGGCCACC   | CTGGTGCACGACGACATCATCGACGGC |
| sko3988_orf4       | 299 | GCGGCCTCGCTCGAACTCTTCCACGCCTTACC    | CTCATCCATGACGACGTCATGGACGCC |
|                    |     |                                     | CTGBTSCACGACGAYVTSATGGAC    |

Antisense primer design:

|                    |     |               |                                                 |
|--------------------|-----|---------------|-------------------------------------------------|
| Conserved residues |     |               | F Q X X D D X L                                 |
| ptmT4              | 675 | CCTGGGCATGGCG | TTCCAGTTGGTCGACGACGTGCTCGGCATCTGGGGCGACCCGGCCGT |
| ptnT4              | 675 | CCTGGGCATGGCG | TTCCAGCTGGTCGACGACGTACTCGGCATATGGGGCGACCCGGCCGT |
| kgris_orf1         | 674 | TCTGGGGATGGCG | TTCCAGCTGGTGGATGACGTCCTGGGCATCTGGGGCGACCCCGCGGC |
| plaT4              | 683 | GCTCGGACTCGCC | TTCCAGATCGCGGACGACATCCTGGGCATCTGGGGCGACCCCGCGC  |
| bra2               | 636 | TCTCGGCTGCGCC | TTCCAGATCGCGGACGATCTGCTGCCGTATCTGGCCGACACCAGCCG |
| sko3988_orf4       | 751 | GATCGGAGAGGCC | TTCCAAGTGGCGGACGACCTGCTCGGCGTCTTCGGCGACCCGTCCAA |
|                    |     |               | TTCCARHWBRYSGACGACVTVMTSGGC                     |

**Figure S3.** Sequence comparisons of *T1*, *T2*, *T3*, and *T4* PCR hit fragments. **(a)** *T4*, **(b)** *T2*, **(c)** *T3*, and **(d)** *T1*. Relative to *ptmT1*, *ptmT2*, *ptmT3*, and *ptmT4* sequences, the percent identities of hit sequences was between 97-98, 63-98, 96-97, and 38-98, respectively.

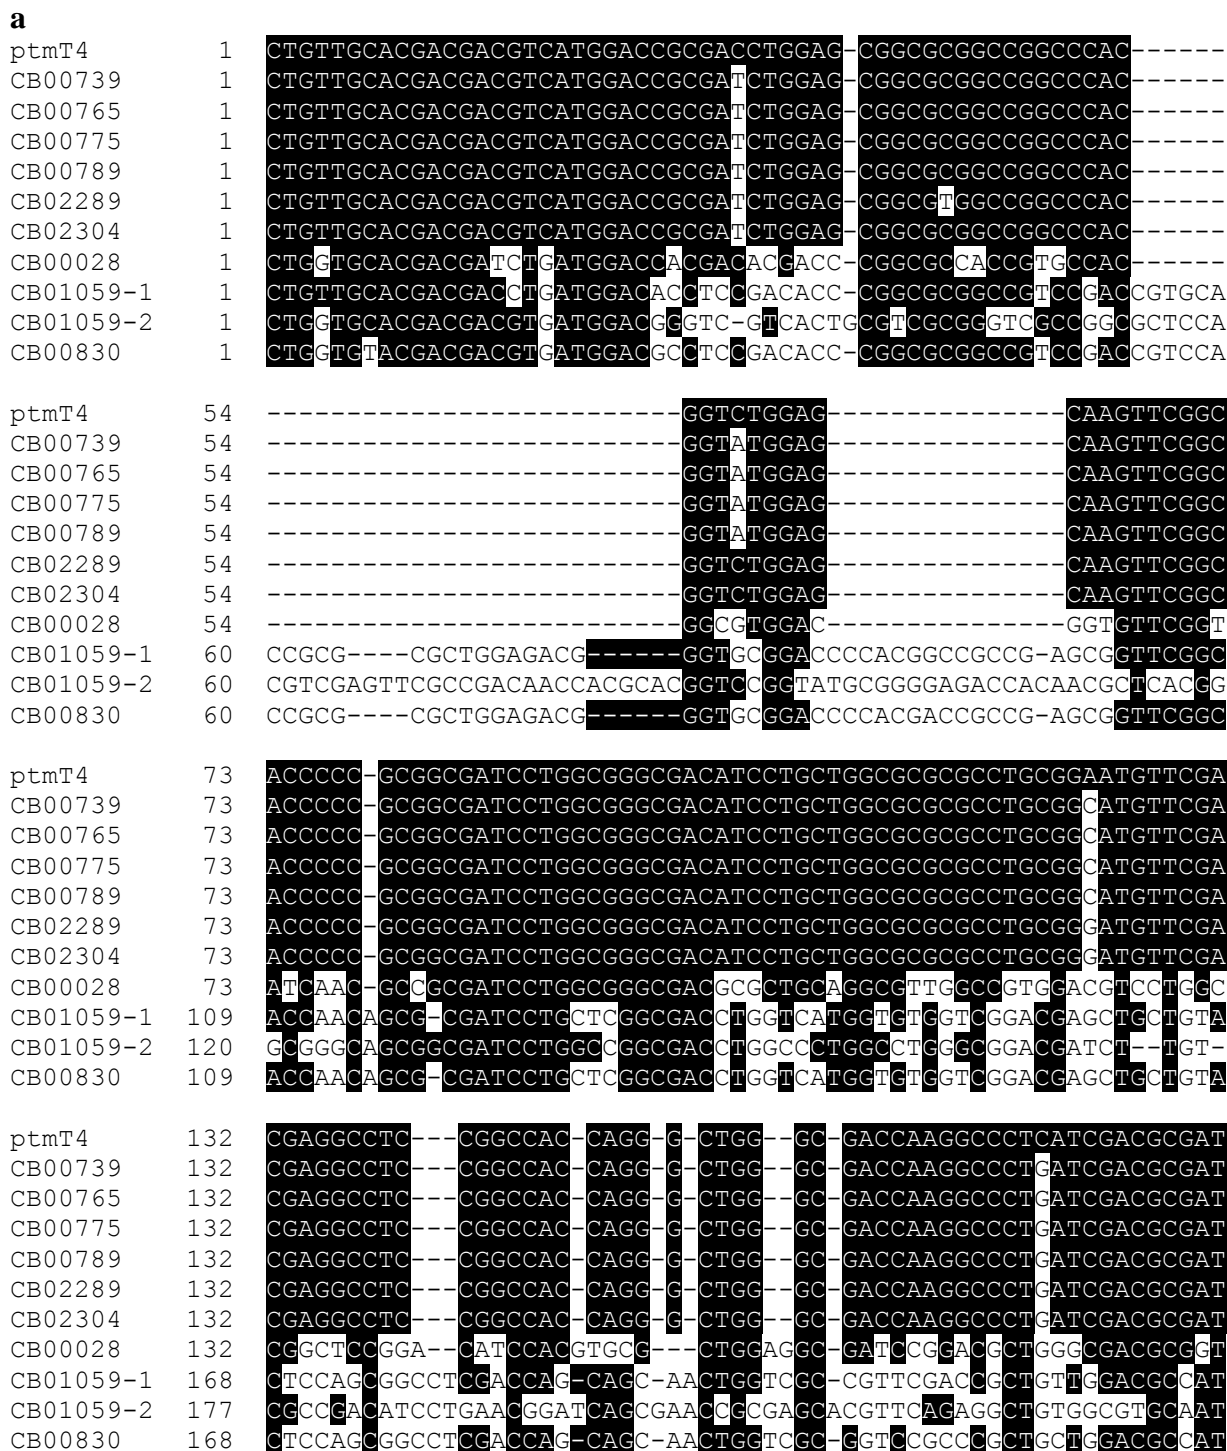

**Figure S3a.** (continued)

```

ptmT4      183  C---GCCGAGCTGGCCGCGGGCCAGATGGCCGACCT-CGCGCTGGAGCGCCGCGC--CAC
CB00739    183  C---GCCGAGCTGGCCGCGGGCCAGATGGCCGACCT-CGCGCTGGAGCGCCGCGC--CAC
CB00765    183  C---GCCGAGCTGGCCGCGGGCCAGATGGCCGACCT-CGCGCTGGAGCGCCGCGC--CAC
CB00775    183  C---GCCGAGCTGGCCGCGGGCCAGATGGCCGACCT-CGCGCTGGAGCGCCGCGC--CAC
CB00789    183  C---GCCGAGCTGGCCGCGGGCCAGATGGCCGACCT-CGCGCTGGAGCGCCGCGC--CAC
CB02289    183  C---GCCGAGCTGGCCGCGGGCCAGATGGCCGACCT-CGCGCTGGAGCGCCGCGC--CAC
CB02304    183  C---GCCGAGCTTGGCCGCGGGCCAGATGGCCGACCT-CGCGCTGGAGCGCCGCGC--CAC
CB00028    186  G---GTGGCGTTGCTCGACGGGCAGGCCTACGACCTCGACTTCGAGACGCGGGCCGACGT
CB01059-1  225  GCGCACCCGAGGTGATGATCGGTCAGTACCGGGACCTGCTGGCC--ACCGGGGAGCC-CAA
CB01059-2  237  GCGCGGTGAAATGGTTCGACAGGCCAGTATCTGGACATGCGCGCCCAAGCGGACGGGT-CAT
CB00830    225  GCGCACCCGAGGTGATGATCGGTCAGTACCGGGACCTGCTGGCC--ACCGGGGAGCC-CAA

ptmT4      237  GGTACCCTGGAAGAGGCCCTCACCGTCTCCGAGCAGAAGACCGCGGCGC-TGCTGCGCT
CB00739    237  GGTACCCTGGAAGAGGCCCTCATGGTCTCCGAGCAGAAGACCGCGGCGC-TGCTGCGCT
CB00765    237  GGTACCCTGGAAGAGGCCCTCATGGTCTCCGAGCAGAAGACCGCGGCGC-TGCTGCGCT
CB00775    237  GGTACCCTGGAAGAGGCCCTCATGGTCTCCGAGCAGAAGACCGCGGCGC-TGCTGCGCT
CB00789    237  GGTACCCTGGAAGAGGCCCTCATGGTCTCCGAGCAGAAGACCGCGGCGC-TGCTGCGCT
CB02289    237  GGTACCCTGGAAGAGGCCCTCATGGTCTCCGAGCAGAAGACCGCGGCGC-TGCTGCGCT
CB02304    237  GGTACCCTGGAAGAGGCCCTCACCGTCTCCGAGCAGAAGACCGCGGCGC-TGCTGCGCT
CB00028    243  CCAGGTGCCCGAGGTGGAGCGGATGGCGCGCGGT---AAGACCGGCGCTC-TGCT-CAGT
CB01059-1  282  CGCGGACGTCGAACGGTCACTGGCGGTGATCCGCTACAAGACGGCCAAAGTACACCGTGA
CB01059-2  296  CCA--CTACGGATCGGGCTTTGCGTATCGCCTGTCTCAAACGGCTCTCTACACGGTTCGA
CB00830    282  CGCGGACGTCGAGCGGTTCGCTGGCGGTGATCCGCTACAAGACGGCCAAAGTACACCGTGA

ptmT4      296  GCGCCTGCA-CGC-TGGGCGCGGGACTCGTCGGCGCGCCCGAGGGGACCAGCCGCGCTT
CB00739    296  GCGCCTGCA-CGC-TGGGCGCGGGACTCGTCGGGGCGCGCCCGAGGGGACCAGCCGCGCTT
CB00765    296  GCGCCTGCA-CGC-TGGGCGCGGGACTCGTCGGCGCGCCCGAGGGGACCAGCCGCGCTT
CB00775    296  GCGCCTGCA-CGC-TGGGCGCGGGACTCGTCGGCGCGCCCGAGGGGACCAGCCGCGCTT
CB00789    296  GCGCCTGCA-CGC-TGGGCGCGGGACTCGTCGGCGCGCCCGAGGGGACCAGCCGCGCTT
CB02289    296  GCGCCTGCA-CGC-TGGGCGCGGGACTCGTCGGCGCGCCCGAGGGGACCAGCCGCGCTT
CB02304    296  GCGCCTGCA-CGC-TGGGCGCGGGACTCGTCGGCGCGCCCGAGCGGACCAGCCGCGCTT
CB00028    298  GCCTCAACGGCTC-TGGGCGCGTTGTACGGCGACG-GCACGGACGAGCAGATCGAGGCGA
CB01059-1  342  GCGGCCGCTGCACATCGGCGCGGCCCTCGCCGGAGCGGACCGGTCC-CTGCTGGACGTCT
CB01059-2  354  ACGACCCCTGGCTCTCGGCGCGGCACTCGCCGGAGCGGACCGAC-GGCCGGACAACGTCCGCTC
CB00830    342  GCGGCCGCTGCACATCGGCGCGGCCCTGGCCGGAGCGGACCGGTCC-CTGCTGGACGTCT

ptmT4      354  CG-GCGCCTTCGGTATGCACCTGGGCATGGCGTTCCAGTTGGTCGACGACGTACTCGGC
CB00739    354  CG-GTGCCTTCGGTATGCACCTGGGCATGGCGTTCCAGCTGGTCGACGACGTACTCGGC
CB00765    354  CG-GTGCCTTCGGTATGCACCTGGGCATGGCGTTCCAGCTGGTCGACGACGTACTCGGC
CB00775    354  CG-GTGCCTTCGGTATGCACCTGGGCATGGCGTTCCAGCTGGTCGACGACGTACTCGGC
CB00789    354  CG-GTGCCTTCGGTATGCACCTGGGCATGGCGTTCCAGCTGGTCGACGACGTACTCGGC
CB02289    354  CG-GCGCCTTCGGCATGCACCTGGGCATGGCGTTCCAAGTGGTCGACGACGTACTCGGC
CB02304    354  CG-GCGCCTTCGGCATGCACCTGGGCATGGCGTTCCAGCTGGTCGACGACGTACTCGGC
CB00028    356  TGCGCGGGTACGGCGCGGAGCTCGGCCTGGCGTTCCAGCACACGGACGACCTCCTCGGC
CB01059-1  401  GCACCGCCTACGCCCTCCCGATCGGGGAGGCCCTTCCAATAGACCGACGACCTACTGGGC
CB01059-2  413  TCTGCTCCGCGGTTCGACGCGAGGTATCGCCTTCCAGTTGACCGACGACCTCATCGGC
CB00830    401  GCACCGCCTACGCCCTCCCGATCGGGGAGGCCCTTCCAATCATGGACGACATACTCGGC

```



**Figure S3.** (continued)

**b**

```
ptmT2      1  CGCCCCGATCCGGCCCGCACCGG-----GCGTCGCCTACCTCCGTGACGTCCAGGCGCGGT
CB02304    1  CCCCCGATCCGGCCCGGCGCCGG-----GCGTCGCCTATCTCCGTGACGTCCAGGCGCGGT
CB00789    1  CCCCCGATCCGGCCCGGCGCCGG-----GCGTCGCCTATCTCCGTGACGTCCAGGCGCGGT
CB00765    1  CCCCCGATCCGGCCCGGCGCCGG-----GCGTCGCCTATCTCCGTGACGTCCAGGCGCGGT
CB00739    1  CCCCCGATCCGGCCCGGCGCCGG-----GCGTCGCCTATCTCCGTGACGTCCAGGCGCGGT
CB02289    1  CCCCCGATCCGGCCCGGCGCCGG-----GCGTCGCCTATCTCCGTGACGTCCAGGCGCGGT
CB00775    1  CCCCCGATCCGGCCCGGCGCCGG-----GCGTCGCCTATCTCCGTGACGTCCAGGCGCGGT
CB00028    1  CGCCCCGATCCGGCCCGGCGCCGG-----GCGTCGCCTATCTCCGTGACGTCCAGGCGCGGT
CB00830    1  CGCCGCACACGGACGCCGTGAAGGAGTGCCTGGAGTATCTGCGTCAGACCCAGGCACGTC
CB01059    1  CGCCGCACACGGACGCCGTGAAGGAGTGCCTGGAGTATCTGCGGCAGACCCAGGCACGTC

ptmT2      55  TCGGCGGTCCGGTGCCCTCCATCACCCCGATCGTCTACTTCGAGCAGGCGTGGGTCCCTCA
CB02304    55  TCGGCGGACCCGGTGCCCTCCATCACCCCGATCGTCTACTTCGAGCAGGCGTGGGTCCCTCA
CB00789    55  TCGGCGGACCCGGTGCCCTCCATCACCCCGATCGTCTACTTCGAGCAGGCGTGGGTCCCTCA
CB00765    55  TCGGCGGACCCGGTGCCCTCCATCACCCCGATCGTCTACTTCGAGCAGGCGTGGGTCCCTCA
CB00739    55  TCGGCGGACCCGGTGCCCTCCATCACCCCGATCGTCTACTTCGAGCAGGCGTGGGTCCCTCA
CB02289    55  TCGGCGGGCCGGTGCCCTCCATCACCCCGATCGTCTACTTCGAGCAGGCGTGGGTCCCTCA
CB00775    55  TCGGCGGACCCGGTGCCCTCCATCACCCCGATCGTCTACTTCGAGCAGGCGTGGGTCCCTCA
CB00028    55  TCGGCGGACCCGGTGCCCTCCATCACCCCGATCGTCTACTTCGAGCAGGCGTGGGTCCCTCA
CB00830    61  ATGGCGGCCCGGTCTCGGGCATCACCTCGATCAACTACTTCGAACTGGCCTGGGTGGTGA
CB01059    61  ATGGCGGCCCGGTCTCGGGCATCACCTCGATCAACTACTTCGAACTGGCCTGGGTGGTGA

ptmT2      115  ACTCGCTGGCCGCCTCCGGCCTGCGCTACGAGGCCCGCCGCGCTCCTCGACA-GCCTC
CB02304    115  ACTCGCTGGCCGCCTCCGGCCTGCGCTACGAGGCCCGCCGCGCTCCTCGACA-GTCTC
CB00789    115  ACTCGCTGGCCGCCTCCGGCCTGCGCTACGAGGCCCGCCGCGCTCCTCGACA-GCCTC
CB00765    115  ACTCGCTGGCCGCCTCCGGCCTGCGCTACGAGGCCCGCCGCGCTCCTCGACA-GCCTC
CB00739    115  ACTCGCTGGCCGCCTCCGGCCTGCGCTACGAGGCCCGCCGCGCTCCTCGACA-GCCTC
CB02289    115  ACTCGCTGGCCGCCTCCGGCCTGCGCTACGAGGCCCGCCGCGCTGCTCGACA-GCCTC
CB00775    115  ACTCGCTGGCCGCCTCCGGCCTGCGCTACGAGGCCCGCCGCGCTCCTCGACA-GCCTC
CB00028    115  ACTCGCTGGCCGCCTCCGGCCTGCGCTACGAGGCCCGCCGCGCTCCTCGACA-GCCTC
CB00830    121  CGGCGTTGTCGGGCTCCGGCCTGGACGTGGACTTCCCCGCCAGATCGCGGACACGCTGC
CB01059    121  CGGCGTTGTCGGGCTCCGGCCTGGACGTGGACTTCCCCGCCAGATCGCGGACACGCTGC

ptmT2      174  GAAGCGGGTCTCACGGACGAGGGCATAGCCGCCGCCCGGGTCTGCCGAGCGACTCCGAC
CB02304    174  GAAGCGGGTCTCACGGACGAGGGCATAGCCGCCGCCCGGGTCTGCCGAGCGACTCCGAC
CB00789    174  GAAGCGGGTCTCACGGACGAGGGCATAGCCGCCGCCCGGGTCTGCCGAGCGACTCCGAC
CB00765    174  GAAGCGGGTCTCACGGACGAGGGCATAGCCGCCGCCCGGGTCTGCCGAGCGACTCCGAC
CB00739    174  GAAGCGGGTCTCACCGACGAGGGCATAGCCGCCGCCCGGGTCTGCCGAGCGACTCCGAC
CB02289    174  GAAGCGGGTCTCACGGACGAGGGCATAGCCGCCGCCCGGGTCTGCCGAGCGACTCCGAC
CB00775    174  GAAGCGGGTCTCACGGACGAGGGCATAGCCGCCGCCCGGGTCTGCCGAGCGACTCCGAC
CB00028    174  GAAGCGGGTCTCACGGACGAGGGCATAGCCGCCGCCCGGGTCTGCCGAGCGACTCCGAC
CB00830    181  GGACCGCGCTGGGCGCGAACGGAC-TGTCCGCTGGCCCCGGGCTCCCGGCCGACTCCGAC
CB01059    181  GGACCGCGCTGGGCGGGAACGGAC-TGTCCGCGGCCCGGGGCTCCCGGCCGACTCCGAC
```

**Figure S3b.** (continued)

```
ptmT2      234  GACACCGCCGCGTCTCTTCGCCCTGGCGCAGCACGGCAGGACGCACCGCCCCGACAGC
CB02304    234  GACACCGCCGCGTCTCTTCGCCCTGGCGCAGCACGGCAGGACGCACCGCCCCGACAGC
CB00789    234  GACACCGCCGCGTCTCTTCGCCCTGGCGCAGCACGGCAGGACGCACCGCCCCGACAGC
CB00765    234  GACACCGCCGCGTCTCTTCGCCCTGGCGCAGCACGGCAGGACGCACCGCCCCGACAGC
CB00739    234  GACACCGCCGCGTCTCTTCGCCCTGGCGCAGCACGGCAGGACGCACCGCCCCGACAGC
CB02289    234  GACACCGCCGCGTCTCTTCGCCCTGGCGCAGCACGGCAGGACGCACCGCCCCGACAGC
CB00775    234  GACACCGCCGCGTCTCTTCGCCCTGGCGCAGCACGGCAGGACGCACCGCCCCGACAGC
CB00028    234  GACACCGCCGCGTCTCTTCGCCCTGGCGCAGCACGGCAGGACGCACCGCCCCGACAGC
CB00830    240  GACACGTTCGGCCGCCCTGCACGCCCTCGACCTCCTTCGGGAAGCCGGAATCGGTTCGACTGC
CB01059    240  GACACGTTCGGCCGCCCTGCACGCCCTCGACTCCTTCGGGAAGCCGGAATCGGTTCGACTGC

ptmT2      294  CTGATGCACTTCCGCCGGGACGGCTACTTCTCCTGCTTCGGCGTCGAGCGCACCCCTTCC
CB02304    294  CTGATGCACTTCCGCCGGGACGGCTACTTCTCCTGCTTCGGCATCGAGCGCACCCCGTCC
CB00789    294  CTGATGCACTTCCGCCGGGACGGCTACTTCTCCTGCTTCGGCGTCGAGCGCACCCCGTCC
CB00765    294  CTGATGCACTTCCGCCGGGACGGCTACTTCTCCTGCTTCGGCGTCGAGCGCACCCCTTCG
CB00739    294  CTGATGCACTTCCGCCGGGACGGCTACTTCTCCTGCTTCGGCGTCGAGCGCACCCCTTCG
CB02289    294  CTGATGCACTTCCGCCGGGACGGCTACTTCTCCTGCTTCGGCGTCGAGCGCACCCCTTCC
CB00775    294  CTGATGCACTTCCGCCGGGACGGCTACTTCTCCTGCTTCGGCGTCGAGCGCACCCCTTCG
CB00028    294  CTGATGCACTTCCGCCGGGACGGCTACTTCTCCTGCTTCGGCGTCGAGCGCACCCCTTCG
CB00830    300  CTGTGGGATTACGACACCGGCCTGTACTTTCACCTGCTTCCCAAGGAACGCACCCCTTCC
CB01059    300  CTGTGGGATTACGACACCGGCCTGTACTTTCACCTGCTTCCCAAGGAACGCACCCCTTCC

ptmT2      354  ACCAGCACCAACGCACACATCCTCGAAGCCCTCGGCCATCACGTACGGTGCGCCCCGAC
CB02304    354  ACCAGCACCAACGCACACATCCTCGAAGCCCTCGGCCATCACGTACGGTGCGCCCCGAC
CB00789    354  ACCAGCACCAACGCACACATCCTCGAAGCCCTCGGCCATCACGTACGGTGCGCCCCGAC
CB00765    354  ACCAGCACCAACGCACACATCCTCGAAGCCCTCGGCCATCACGTACGGTGCGCCCCGAC
CB00739    354  ACCAGCACCAACGCACACATCCTCGAAGCCCTCGGCCATCACGTACGGTGCGCCCCGAC
CB02289    354  ACCAGCACCAACGCACACATCCTCGAAGCCCTCGGCCATCACGTACGGTGCGCCCCGAC
CB00775    354  ACCAGCACCAACGCACACATCCTCGAAGCCCTCGGCCATCACGTACGGTGCGCCCCGAC
CB00028    354  ACCAGCACCAACGCACACATCCTCGAAGCCCTCGGCCATCACGTACGGTGCGCCCCGAC
CB00830    360  ACCTCGACGAACGCCACATCCTCGTCGCCCTGGCGGATCGC--CGCGGA----CAGGGC
CB01059    360  ACCTCGACGAACGCCACATCCTCGTCGCCCTGGCGGATCGC--CGCGGA----CAGGGC

ptmT2      414  GACGCGGGACGCTATGGCGCGGAGATCCGGATGATCAGCGACTGGCTGCTGGACAACCAG
CB02304    414  GACGCGGGACGCTACGGCGCGGAGATCCGGATGATCGGCGACTGGCTGCTGGACAACCAG
CB00789    414  GACGCGGGACGCTACGGCGCGGAGATCCGGATGATCAGCGACTGGCTGCTGGACAACCAG
CB00765    414  GACGCGGGACGCTACGGCGCGGAGATCCGGATGATCAGCGACTGGCTGCTGGACAACCAG
CB00739    414  GACGCGGGACGCTACGGCGCGGAGATCCGGATGATCAGCGACTGGCTGCTGGACAACCAG
CB02289    414  GACGCGGGACGCTATGGCGCGGAGATCCGGATGATCAGCGACTGGCTGCTGGACAACCAG
CB00775    414  GACGCGGGACGCTACGGCGCGGAGATCCGGATGATCAGCGACTGGCTGCTGGACAACCAG
CB00028    414  GACGCGGGACGCTACGGCGCGGAGATCCGGATGATCAGCGACTGGCTGCTGGACAACCAG
CB00830    414  GACACGCGCTGCGACGAGCCCGCCGAGCGGGTG---GGCGGCTGGCTCGTTCGAGCAGCAG
CB01059    414  GACACGCGCTGCGACGAGCCCGCCGAGCGAGTG---GGCGGCTGGCTCGTTCGAGCAGCAG

ptmT2      474  CTGCCCCACGGCAGCTGGATGGACAAGTGGCACGCCTCGCCGTACTION
CB02304    474  CTGCCCCACGGCAGCTGGATGGACAAGTGGCACGCCTCGCCGTACTION
CB00789    474  CTGCCCCACGGCAGCTGGATGGACAAGTGGCACGCCTCGCCGTACTION
CB00765    474  CTGCCCCACGGCAGCTGGATGGACAAGTGGCACGCCTCGCCGTACTION
CB00739    474  CTGCCCCACGGCAGCTGGATGGACAAGTGGCACGCCTCGCCGTACTION
CB02289    474  CTGCCCCACGGCAGCTGGATGGACAAGTGGCACGCCTCGCCGTACTION
CB00775    474  CTGCCCCACGGCAGCTGGATGGACAAGTGGCACGCCTCGCCGTACTION
CB00028    474  CTGCCCCACGGCAGCTGGATGGACAAGTGGCACGCCTCGCCGTACTION
CB00830    471  GAGCCGGACGGCCGGTGGATGGACAAGTGGCACGCCTCGCCGTACTION
CB01059    471  GAGCCGGACGGCCGGTGGATGGACAAGTGGCACGCCTCGCCGTACTION
```

**Figure S3.** (continued)

**c**

|         |     |                                                               |
|---------|-----|---------------------------------------------------------------|
| ptmT3   | 1   | TATCTGCTCGACGGCAGGCTCGACGACTTCGAGCACTACGGCACCCGGCCCCGAGGACGTC |
| CB00739 | 1   | TATCTCCTCGACGGCCGGCTCGACGACTCCGAGCACTACGGCACCCGGCCCCGAGGACGTC |
| CB00765 | 1   | TATCTCCTCGACGGCCGGCTCGACGACTCCGAGCACTACGGCACCCGGCCCCGAGGACGTC |
| CB00775 | 1   | TATCTCCTCGACGGCCGGCTCGACGACTCCGAGCACTACGGCACCCGGCCCCGAGGACGTC |
| CB00789 | 1   | TATCTCCTCGACGGCCGGCTCGACGACTCCGAGCACTACGGCACCCGGCCCCGAGGACGTC |
| CB02289 | 1   | TATCTGCTCGACGGCCGGCTCGACGACTGCGAGCGCTACGGCACCCGGCCCCGAGGACGTC |
| CB02304 | 1   | TACCTGCTCGACGGCAGGCTCGACGACTCCGAGCACTACGGCACCCGGCCCCGAGGACGTC |
|         |     |                                                               |
| ptmT3   | 61  | GGCCGGCGGGTGATCGCCGTA TCCGCGGCGGCCGTGCCGAGGCGGAGCCGACGACTTC   |
| CB00739 | 61  | GGCCGGCGGGTGATCGCCGTA TCCGCGGCGGCCGTGCCGAGGCGGAGCCGCGACTTC    |
| CB00765 | 61  | GGCCGGCGGGTGATCGCCGTA TCCGCGGCGGCCGTGCCGAGGCGGAGCCGCGACTTC    |
| CB00775 | 61  | GGCCGGCGGGTGATCGCCGTA TCCGCGGCGGCCGTGCCGAGGCGGAGCCGCGACTTC    |
| CB00789 | 61  | GGCCGGCGGGTGATCGCCGTA TCCGCGGCGGCCGTGCCGAGGCGGAGCCGCGACTTC    |
| CB02289 | 61  | GGCCGGCGGGTGATCGCCGTA TCCGCGGCGGCCGTGCCGAGGCGGAGCCGCGACTTC    |
| CB02304 | 61  | GGCCGGCGGGTGATCGCCGTA TCCGCGGCGGCCGTGCCGAGGCGGAGCCGCGACTTC    |
|         |     |                                                               |
| ptmT3   | 121 | TTTCGAGACCTCGCTCGCCGCACTGGTCGAGGAGCTGCGGACCCGGGACGGCTGCTGCGGG |
| CB00739 | 121 | TTTCGAGACCTCGCTCGCCGCACTGGTCGAGGAGCTGCGGAGGCGGGACGGCTGCTGCGGG |
| CB00765 | 121 | TTTCGAGACCTCGCTCGCCGCACTGGTCGAGGAGCTGCGGAGGCGGGACGGCTGCTGCGGG |
| CB00775 | 121 | TTTCGAGACCTCGCTCGCCGCACTGGTCGAGGAGCTGCGGAGGCGGGACGGCTGCTGCGGG |
| CB00789 | 121 | TTTCGAGACCTCGCTCGCCGCACTGGTCGAGGAGCTGCGGAGGCGGGACGGCTGCTGCGGG |
| CB02289 | 121 | TTTCGAGACCTCGCTCGCCGCACTGGTCGAGGAGCTGCGGAGGCGGGACGGCTGCTGCGGG |
| CB02304 | 121 | TTTCGAGACCTCGCTCGCCGCACTGGTCGAGGAGCTGCGGAGGCGGGACGGCTGCTGCGGG |
|         |     |                                                               |
| ptmT3   | 181 | CTGCTGGAGCGGTTTCGTGCTGCGGCTGGTGGACGGGGTCCGTGCGGGGGTGCGCCAGGCG |
| CB00739 | 181 | CTGCTGGAGCGGTTTCGTGCTGCGGCTGGTGGACGGGGTCCGCGCGGGGGTGCGGCAGGCC |
| CB00765 | 181 | CTGCTGGAGCGGTTTCGTGCTGCGGCTGGTGGACGGGGTCCGCGCGGGGGTGCGGCAGGCC |
| CB00775 | 181 | CTGCTGGAGCGGTTTCGTGCTGCGGCTGGTGGACGGGGTCCGCGCGGGGGTGCGGCAGGCC |
| CB00789 | 181 | CTGCTGGAGCGGTTTCGTGCTGCGGCTGGTGGACGGGGTCCGCGCGGGGGTGCGGCAGGCC |
| CB02289 | 181 | CTGCTGGAGCGGTTTCGTGCTGCGGCTGGTGGACGGGGTCCGTGCGGGGGTGCGGCAGGCC |
| CB02304 | 181 | CTGCTGGAGCGGTTTCGTGCTGCGGCTGGTGGACGGGGTCCGTGCGGGGGTGCGGCAGGCC |
|         |     |                                                               |
| ptmT3   | 241 | GTGCTCAGTCGGCGGATCGCCGAGGGCGCGGAGCCGCTGCCACCATGGAGGACTTCCTC   |
| CB00739 | 241 | GTGCTCAGCCGGCGGATCGCCGAGGGCACCGAGCCGCTGCCACCATGGAGGACTTCCTC   |
| CB00765 | 241 | GTGCTCAGCCGGCGGATCGCCGAGGGCACCGAGCCGCTGCCACCATGGAGGACTTCCTC   |
| CB00775 | 241 | GTGCTCAGCCGGCGGATCGCCGAGGGCACCGAGCCGCTGCCACCATGGAGGACTTCCTC   |
| CB00789 | 241 | GTGCTCAGCCGGCGGATCGCCGAGGGCACCGAGCCGCTGCCACCATGGAGGACTTCCTC   |
| CB02289 | 241 | GTGCTCAGCCGGCGGATCGCCGAGGGCACCGAGCCGCTGCCACCATGGAGGACTTCCTC   |
| CB02304 | 241 | GTGCTCAGCCGGCGGATCGCCGAGGGCACCGAGCCGCTGCCACCATGGAGGACTTCCTC   |
|         |     |                                                               |
| ptmT3   | 301 | GAACTGGCCTACCGGCACGTCAACTACCGCAGTGTGGCCCTGGCACTGCTGATCACCGTG  |
| CB00739 | 301 | GAACTGGCCTACCGGCACGTCAACTACCGCAGTGTGGCCCTGGCACTGCTGATCACCGTG  |
| CB00765 | 301 | GAACTGGCCTACCGGCACGTCAACTACCGCAGTGTGGCCCTGGCACTGCTGATCACCGTG  |
| CB00775 | 301 | GAACTGGCCTACCGGCACGTCAACTACCGCAGTGTGGCCCTGGCACTGCTGATCACCGTG  |
| CB00789 | 301 | GAACTGGCCTACCGGCACGTCAACTACCGCAGTGTGGCCCTGGCACTGCTGATCACCGTG  |
| CB02289 | 301 | GAACTGGCCTACCGGCACGTCAACTACCGCAGTGTGGCCCTGGCGCTGCTGATCACCGTG  |
| CB02304 | 301 | GAACTGGCCTACCGGCACGTCAACTACCGCAGTGTGGCCCTGGCACTGCTGATCACCGTG  |

**Figure S3c.** (continued)

ptmT3 361 GGCGAGCGTCCGGACAGCGCGGGCAGGAGCGGCTCGACGCGGCCCTCGTCCC GGCGTCCG  
CB00739 361 GGCGAGCGTCCGGACAGCGCGGGCAGGAGCGGCTCGACGCGGCCCTCGTCCC GGCGTCCG  
CB00765 361 GGCGAGCGTCCGGACAGCGCGGGCAGGAGCGGCTCGACGCGGCCCTCGTCCC GGCGTCCG  
CB00775 361 GGCGAGCGTCCGGACAGCGCGGGCAGGAGCGGCTCGACGCGGCCCTCGTCCC GGCGTCCG  
CB00789 361 GGCGAGCGTCCGGACAGCGCGGGT CAGGAGCGGCTCGACGCGGCCCTCGTCCC GGCGTCCG  
CB02289 361 GGCGAGCAGTCCGGACAGCGCGGCCAGGAGCGGCTCGACGCGGCCCTCGTCCC GGCGTCCG  
CB02304 361 GGCGAGCGTCCGGACAGCGCGGGCAGGAGCGGCTCGACGCGGCCCTCGTCCC GGCGTCCG

ptmT3 421 AGGGCGGTCCGGCTCGCCAACGATCTGCGGACCTGGGCCAA  
CB00739 421 CGGGCGGTCCGGCTCGCCAACGATCTGCGGACCTGGGCCAA  
CB00765 421 CGGGCGGTCCGGCTCGCCAACGATCTGCGGACCTGGGCCAA  
CB00775 421 CGGGCGGTCCGGCTCGCCAACGATCTGCGGACCTGGGCCAA  
CB00789 421 CGGGCGGTCCGGCTCGCCAACGATCTGCGGACCTGGGCCAA  
CB02289 421 AGGGCGGTCCGGCTCGCCAACGATCTGCGGACCTGGGCCAA  
CB02304 421 CGGGCGGTCCGGCTCGCCAACGATCTGCGGACCTGGGCCAA

**d**

ptmT1 1 CCGGGCTGGACATCCGGGCGGACACCCACACCAGCGGCAAGGAGAGCATCGCCCGCGCCA  
CB02304 1 CCGGGCTGGACATCCGGGCGGACACCCACACCAGCGGCAAGGAGAGCATCGCCCGCGCCA  
CB00765 1 CCGGGCTGGACATCCGGGCGGACACCCACACCAGCGGCAAGGAGAGCATCGCCCGCGCCA  
CB00775 1 CCGGGCTGGACATCCGGGCGGACACCCACACCAGCGGCAAGGAGAGCATCGCCCGCGCCA  
CB00789 1 CCGGGCTGGACATCCGGGCGGACACACACACCAGCGGCAAGGAGAGCATCGCCCGCGCCA  
CB00739 1 CCGGGCTGGACATCCGGGCGGACACCCACACCAGCGGCAAGGAGAGCATCGCCCGCGCCA  
CB02289 1 CCGGGCTGGACATCCGGGCGGACACCCACACCAGCGGCAAGGAGAGCATCGCCCGCGCCA

ptmT1 61 CCCAGCACCTCAGCGTCCGCACCGCGTTACCTGCGCGGCACTGGAGATGGCGCTCGCCC  
CB02304 61 CCCAACAATCTCAGCGTCCGCACCGCGTTACCTGCGCGGCACTGGAGATGGCGCTCGCCC  
CB00765 61 CCCAACGCCTCAGCGTCCGCACCGCGTTACCTGCGCGGCACTGGAGATGGCGCTCGCGC  
CB00775 61 CCCAACGCCTCAGCGTCCGCACCGCGTTACCTGCGCGGCACTGGAGATGGCGCTCGCGC  
CB00789 61 CCCAACGCCTCAGCGTCCGCACCGCGTTACCTGCGCGGCACTGGAGATGGCGCTCGCGC  
CB00739 61 CCCAACGCCTCAGCGTCCGCACCGCGTTACCTGCGCGGCACTGGAGATGGCGCTCGCCC  
CB02289 61 CCCAGCACCTCAGCGTCCGCACCGCGTTACCTGCGCGGCACTGGAGATGGCGCTCGCCC

ptmT1 121 TCGGGCTGTGGTCTGGGTTCGCGCTCTGGCTCGGCCGGCCGCTCGTTCGCGGTGGGGTGG  
CB02304 121 TCGGGCTGTGGTCTGGGTTCGCGCTCTGGCTCGGCCGGCCGCTCGTTCGCGGTGGGGTGG  
CB00765 121 TCGGGCTGTGGTCTGGGTTCGCGCTCTGGCTCGGCCGGCCGCTCGTTCGCGGTGGGGTGG  
CB00775 121 TCGGGCTGTGGTCTGGGTTCGCGCTCTGGCTCGGCCGGCCGCTCGTTCGCGGTGGGGTGG  
CB00789 121 TCGGGCTGTGGTCTGGGTTCGCGCTCTGGCTCGGCCGGCCGCTCGTTCGCGGTGGGGTGG  
CB00739 121 TCGGGCTGTGGTCTGGGTTCGCGCTCTGGCTCGGCCGGCCGCTCGTTCGCGGTGGGGTGG  
CB02289 121 TCGGGCTGTGGTCTGGGTTCGCGCTCTGGCTCGGCCGGCCGCTCGTTCGCGGTGGGGTGG

ptmT1 181 CGCTGTGCATCGTGCTCCACCTCGCCTACAACCTGGAGCCGGTCCGGCTCAAGCGGCGCG  
CB02304 181 CGCTGTGCATCGTGCTCCACCTCGCCTACAACCTGGAGCCGGTCCGGCTCAAGCGGCGCG  
CB00765 181 CGCTATCGGTTCGTGCTCCACCTCGCCTACAACCTGGAGCCGGTCCGGCTCAAGCGGCGCG  
CB00775 181 CGCTATCGGTTCGTGCTCCACTTCGCCTACAACCTGGAGCCGGTCCGGCTCAAGCGGCGCG  
CB00789 181 CGCTGTGGTTCGTGCTCCACCTCGCCTACAACCTGGAGCCGGTCCGGCTCAAGCGGCGCG  
CB00739 181 CGCTGTGGTTCGTGCTCCACCTCGCCTACAACCTGGAGCCGGTCCGGCTCAAGCGGCGCG  
CB02289 181 CACTGTGCATCGTGCTCCACCTCGCCTACAACCTGGAGCCGGTCCGGCTCAAGCGGCGCG

**Figure S3d.** (continued)

|         |     |                                                                |
|---------|-----|----------------------------------------------------------------|
| ptmT1   | 241 | GCTACGCCAACCCCGCCTACTTCGGGGCGACGTTTCGCCTTCCTGCCGTGCTGTTCGACGT  |
| CB02304 | 241 | GCTACGCCAACCCCGCCTACTTCGGGGCGACGTTTCGCCTTCCTGCCGTGCTGTTCGACGT  |
| CB00765 | 241 | GCTACGCCAACCCCGCCTACTTCGGGGCGACGTTTCGCCTTCCTGCCGTGCTGTTCGACGT  |
| CB00775 | 241 | GCTACGCCAACCCCGCCTACTTCGGGGCGACGTTTCGCCTTCCTGCCGTGCTGTTCGACGT  |
| CB00789 | 241 | GCTACGCCAACCCCGCCTACTTCGGGGCGACGTTTCGCCTTCCTGCCGTGCTGTTCGACGT  |
| CB00739 | 241 | GCTACGCCAACCCCGCCTACTTCGGGGCGACGTTTCGCCTTCCTGCCGTGCTGTTCGACGT  |
| CB02289 | 241 | GCTACGCCAACCCCGCCTACTTCGGGGCGACGTTTCGCCTTCCTGCCGTGCTGTTCGACGT  |
|         |     |                                                                |
| ptmT1   | 301 | ATGCGGCGGTGCGGGCGGACGTACCGCCCAGCGCGTGGCTGTTTCCTCACCAGGGCTCGGCA |
| CB02304 | 301 | ATGCGGCGGTGCGGGCGGACGTACCGCTCAGCGCGTGGCTGTTTCCTCACCAGGGCTCGGCA |
| CB00765 | 301 | ATGCGGCGGTGCGGGCGGACGTACCGCTCAGCGCGTGGCTGTTTCCTCACCAGGGCTCGGCA |
| CB00775 | 301 | ATGCGGCGGTGCGGGCGGACGTACCGCTCAGCGCGTGGCTGTTTCCTCACCAGGGCTCGGCA |
| CB00789 | 301 | ATGCGGCGGTGCGGGCGGACGTACCGCTCAGCGCGTGGCTGTTTCCTCACCAGGGCTCGGCA |
| CB00739 | 301 | ATGCGGCGGTGCGGGCGGACGTACCGCTCAGCGCGTGGCTGTTTCCTCACCAGGGCTCGGCA |
| CB02289 | 301 | ATGCGGCGGTGCGGGCGGACGTACCGCTCAGCGCGTGGCTGTTTCCTCACCAGGGCTCGGCA |
|         |     |                                                                |
| ptmT1   | 361 | TCCTGCTGTTTCGGCCGCTCCCTGTGGTGGTGCATCCCAGGATCTGATCGGTGACGCCAAGG |
| CB02304 | 361 | TCCTGCTGTTTCGGCCGCTCCCTGTGGTGGTGCATCCCAGGATCTGATCGGTGACGCCAAGG |
| CB00765 | 361 | TCCTGCTGTTTCGGCCGCTCCCTGTGGTGGTGCATCCCAGGATCTGATCGGTGACGCCAAGG |
| CB00775 | 361 | TCCTGCTGTTTCGGCCGCTCCCTGTGGTGGTGCATCCCAGGATCTGATCGGTGACGCCAAGG |
| CB00789 | 361 | TCCTGCTGTTTCGGCCGCTCCCTGTGGTGGTGCATCCCAGGATCTGATCGGTGACGCCAAGG |
| CB00739 | 361 | TCCTGCTGTTTCGGCCGCTCCCTGTGGTGGTGCATCCCAGGATCTGATCGGTGACGCCAAGG |
| CB02289 | 361 | TCCTGCTGTTTCGGCCGCTCCCTGTGGTGGTGCATCCCAGGATCTGATCGGTGACGCCAAGG |
|         |     |                                                                |
| ptmT1   | 421 | CGGGGGACCGTACGCCCGCCGTACAGCACGGCCCGCGCCATGCGCTGGTGGTGGCGTGCC   |
| CB02304 | 421 | CCGGGGACCGTACGCCCGCCGTACAGCACGGCCCGCGCCATGCGCTGGTGGTGGCGTGCC   |
| CB00765 | 421 | CCGGGGACCGTACGCCCGCCGTACAGCACGGCCCGCGCCATGCGCTGGTGGTGGCGTGCC   |
| CB00775 | 421 | CCGGGGACCGTACGCCCGCCGTACAGCACGGCCCGCGCCATGCGCTGGTGGTGGCGTGCC   |
| CB00789 | 421 | CCGGGGACCGTACGCCCGCCGTACAGCACGGCCCGCGCCATGCGCTGGTGGTGGCGTGCC   |
| CB00739 | 421 | CCGGGGACCGTACGCCCGCCGTACAGCACGGCCCGCGCCATGCGCTGGTGGTGGCGTGCC   |
| CB02289 | 421 | CCGGTACCGTACGCCCGCCGTACAGCACGGCCCGCGCCATGCGCTGGTGGTGGCGTGCC    |
|         |     |                                                                |
| ptmT1   | 481 | TGTGGACCGCGCTCGGGCTGCTGTTTCATCGGCGCCGGGCTGTGGCCGTACGGCGTCTTCT  |
| CB02304 | 481 | TGTGGACCGCGCTCGGGCTGCTGTTTCATCGGCGCCGGGCTGTGGCCGTACGGCGTCTTCT  |
| CB00765 | 481 | TGTGGACCGCGCTCGGGCTGCTGTTTCATCGGCGCCGGGCTGTGGCCGTACGGCGTCTTCT  |
| CB00775 | 481 | TGTGGACCGCGCTCGGGCTGCTGTTTCATCGGCGCCGGGCTGTGGCCGTACGGCGTCTTCT  |
| CB00789 | 481 | TGTGGACCGCGCTCGGGCTGCTGTTTCATCGGCGCCGGGCTGTGGCCGTACGGCGTCTTCT  |
| CB00739 | 481 | TGTGGACCGCGCTCGGGCTGCTGTTTCATCGGCGCCGGGCTGTGGCCGTACGGCGTCTTCT  |
| CB02289 | 481 | CGTGGACCGCGCTCGGGCTGCTGTTTCATCGGCGCCGGGCTGCGGCCGTACGGCGTCTTCT  |
|         |     |                                                                |
| ptmT1   | 541 | GGGCGCTGCTCGGCATCCTGGCGAGCGCCGCCTTCCTCGTGGACAAGATCAAAGTCTGCTGC |
| CB02304 | 541 | GGGCGCTGCTCGGCATCCTGGCGAGCGCCGCCTTCCTCGTGGACAAGATCAAAGTCTGCTGC |
| CB00765 | 541 | GGGCGCTGCTCGGCATCCTGGCGAGCGCCGCCTTCCTCGTGGACAAGATCAAAGTCTGCTGC |
| CB00775 | 541 | GGGCGCTGCTCGGCATCCTGGCGAGCGCCGCCTTCCTCGTGGACAAGATCAAAGTCTGCTGC |
| CB00789 | 541 | GGGCGCTGCTCGGCATCCTGGCGAGCGCCGCCTTCCTCGTGGACAAGATCAAAGTCTGCTGC |
| CB00739 | 541 | GGGCGCTGCTCGGCATCCTGGCGAGCGCCGCCTTCCTCGTGGACAAGATCAAAGTCTGCTGC |
| CB02289 | 541 | GGGCGCTGCTCGGCATCCTGGCGAGCGCCGCCTTCCTCGTGGACAAGATCAAAGTCTGCTGC |

**Figure S3d.** (continued)

|         |     |                                                               |
|---------|-----|---------------------------------------------------------------|
| ptmT1   | 601 | GGAGCATCTCGCGGGAGAACCTCCCGCACGAGTCCACGATGCGCAAGCACAGCCTCTCGC  |
| CB02304 | 601 | GGAGCATCTCGCGGGAGAACCTCCCGCACGAGTCCACGATGCGCAAGCACAGCCTCTCGC  |
| CB00765 | 601 | GGCACATCTCGCGGGAGAACCTCCCGCACGAGTCCACGATGCGCAAGCACAGCCTCTCGC  |
| CB00775 | 601 | GGCACATCTCGCGGGAGAACCTCCCGCACGAGTCCACGATGCGCAAGCACAGCCTCTCGC  |
| CB00789 | 601 | GGCACATCTCGCGGGAGAACCTCCCGCACGAGTCCACGATGCGCAAGCACAGCCTCTCGC  |
| CB00739 | 601 | GGCACATCTCGCGGGAGAACCTCCCAACACGAGTCCACGATGCGCAAGCACAGCCTCTCGC |
| CB02289 | 601 | GGCACATCTCGCGGGAGAACCTCCCGCACGAGTCCACGATGCGCAAGCACAGCCTCTCGC  |

|         |     |                                      |
|---------|-----|--------------------------------------|
| ptmT1   | 661 | TGGCGATGGGCGGGGACCTCCTGCTCTGCGCCATCC |
| CB02304 | 661 | TGGCGATGGGCGGGGACCTCCTGCTCTGCGCCATCC |
| CB00765 | 661 | TGGCGATGGGCGGGGACCTCCTGCTCTGCGCCATCC |
| CB00775 | 661 | TGGCGATGGGCGGGGACCTCCTGCTCTGCGCCATCC |
| CB00789 | 661 | TGGCGATGGGCGGGGACCTCCTGCTCTGCGCCATCC |
| CB00739 | 661 | TGGCGATGGGCGGGGACCTCCTGCTCTGCGCCATCC |
| CB02289 | 661 | TGGCGATGGGCGGGGACCTCCTGCTCTGCGCCATCC |

**Figure S4.** Genetic organization of the PTM-PTN biosynthetic gene clusters in *S. platensis* MA7327, *S. platensis* CB00739, and *S. platensis* CB00765. The PTM-PTN clusters in *S. platensis* CB00739 (KJ189771) and *S. platensis* CB00765 (KJ189772) share 99% identity in nucleotide sequence, and their nucleotide sequences are 97% identical to *S. platensis* MA7327<sup>10</sup> (FJ655920).

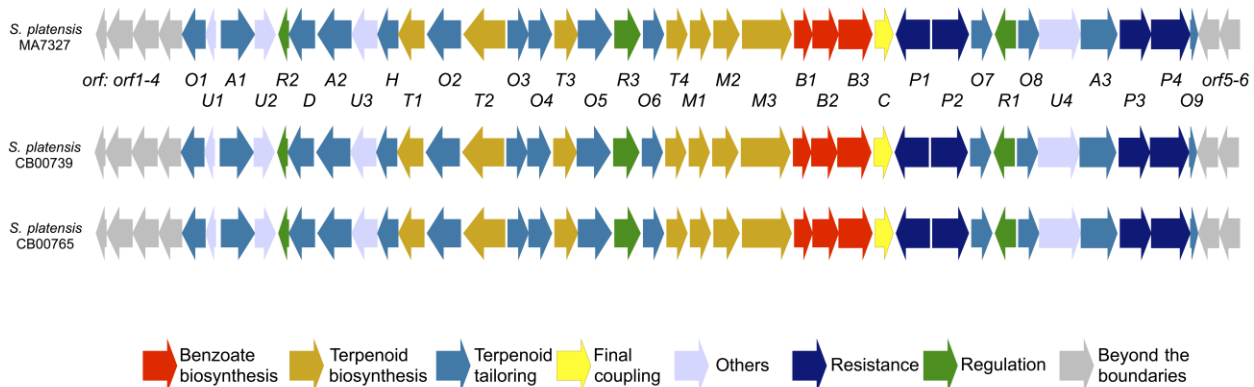

**Figure S5.** The new platensimycin and platencin dual-producers are distinct from *S. platensis* MA7327, showing superior genetic amenability. **(a)** Phylogenetic tree generated from the alignment of concatenated partial sequences of the four housekeeping genes 16S rRNA, *recA*, *rpoB*, and *trpB* (2975-bp total) using the Tamura-Nei evolutionary distance method and the neighbor-joining algorithm. Bootstrap values  $\geq 70\%$  (based on 100 resampled trials) are given at nodes. Bar, 0.02 substitutions per nucleotide position. Nucleotide sequences of the housekeeping genes for *S. coelicolor* A3(2) (AL645882), *S. avermitilis* MA-4680 (BA000030), *S. rimosus* ATCC 10970 (ANSJ00000000), *S. griseus* NBRC 13350 (AP009493), *S. scabies* 87.22 (NC\_013929), *S. venezuelae* ATCC 10712 (FR845719), and *S. clavuligerus* ATCC 27064 (ADWJ00000000) were obtained from the NCBI database and used as relevant *Streptomyces* spp. for phylogenetic analysis. *Streptosporangium roseum* DSM43021 (CP001814) and *Mycobacterium tuberculosis* H37Rv (AL123456) were used as outgroups. **(b)** Morphology of the six new platensimycin and platencin dual-producers of *S. platensis* CB00739, CB00765, CB00775, CB00789, CB02289, and CB02304 in comparison with *S. platensis* MA7327 and MA7339 on an ISP4 agar plate.

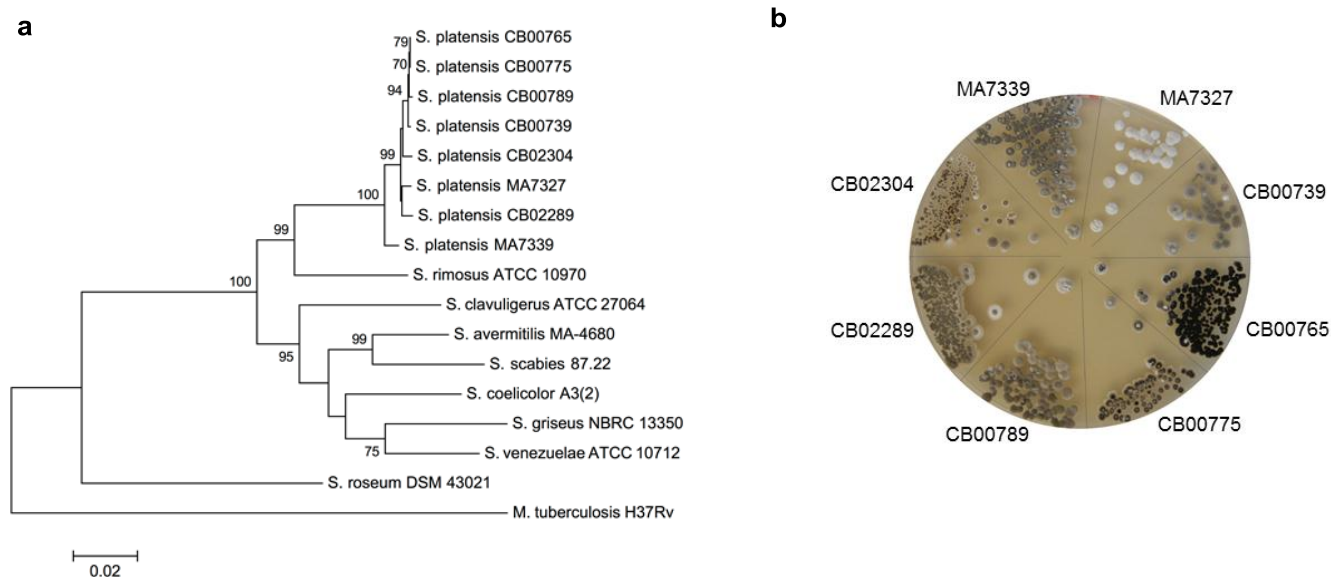



**Figure S6.** Production of platensimycin (●) and platencin (◆) by *Streptomyces platensis* spp. (a) Structures of platensimycin (PTM) and platencin (PTN), (b) HPLC chromatograms of crude extracts prepared from: left column, original and new PTM-PTN-producing *Streptomyces platensis* spp.; and right column, previously reported and new  $\Delta ptmR1$  deletion mutants. The y-axes are kept constant between the two panels for visualization of the significant increase in titers. Crude extracts for SB12001, SB12002, SB12026, and SB12028 were diluted 4-fold for better representation of PTM and PTN production, (c) Extracted ion ( $m/z$  at 442.1863 for the [PTM + H]<sup>+</sup> ion and  $m/z$  at 426.1914 for the [PTN + H]<sup>+</sup> ion) chromatograms from LC-MS analyses of: left column, original and new PTM-PTN-producing *Streptomyces platensis* spp.; and right column, previously reported and new  $\Delta ptmR1$  deletion mutants.

**a**

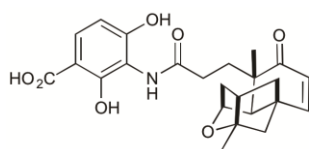

**Platensimycin**

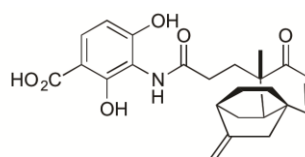

**Platencin**

**b**

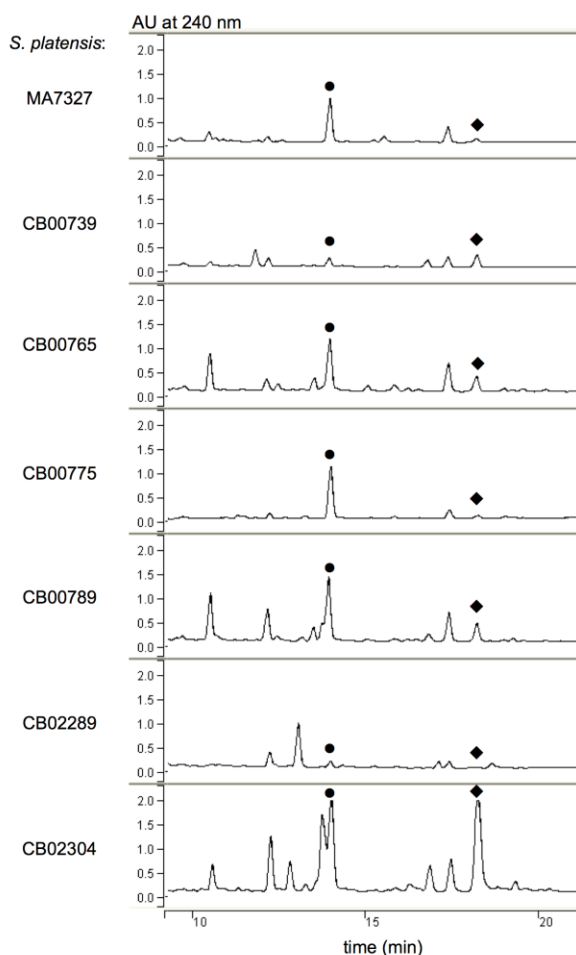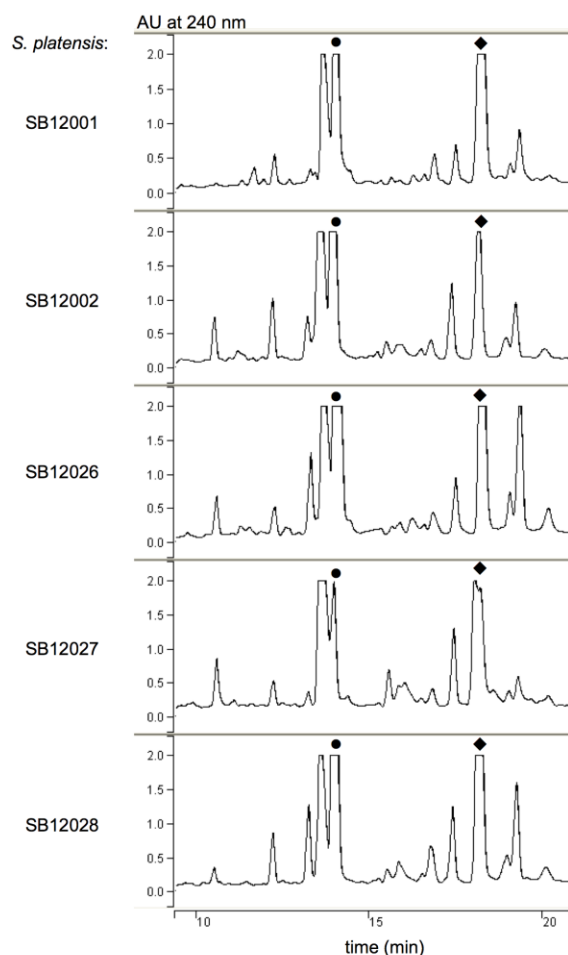

c

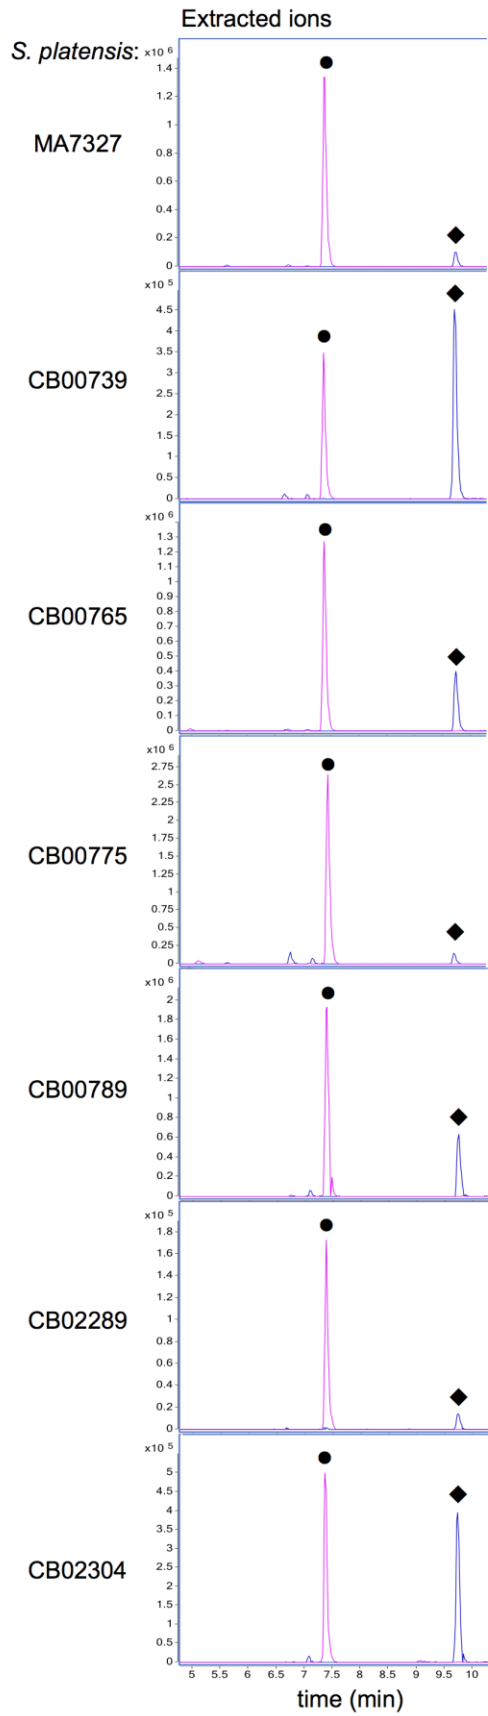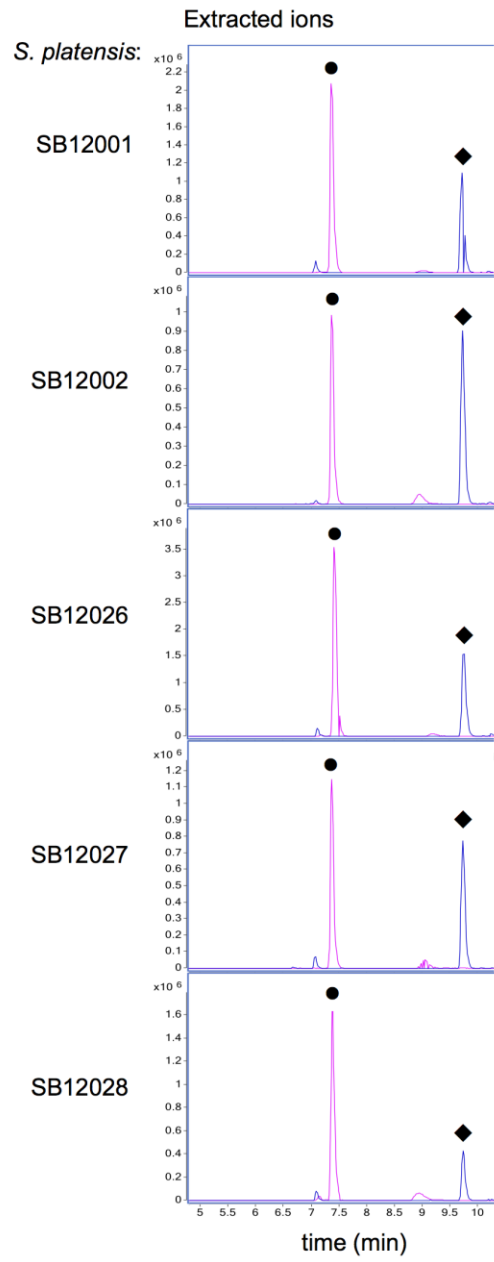

**Figure S7.** Inactivation of *ptmR1* in three new PTM-PTN producers affording *S. platensis* SB12026, SB12027, and SB12028. **(a)** Schematic representation of the deletion of *S. platensis ptmR1* by insertion of an apramycin resistance-oriT cassette (*aac(3)IV + oriT*), **(b)** PCR verification of wild-type and double crossover mutant genotypes, using the primers *ptmRidF* and *ptmRidR*. Lane 1, 1 Kb Plus DNA ladder (Invitrogen); lane 2, *S. platensis* CB00739; lanes 3-4, two isolates of *S. platensis* SB12026; lane 5, *S. platensis* CB00775; lanes 6-7, *S. platensis* SB12028; lane 8, *S. platensis* CB00765; lanes 9-10, *S. platensis* SB12027.

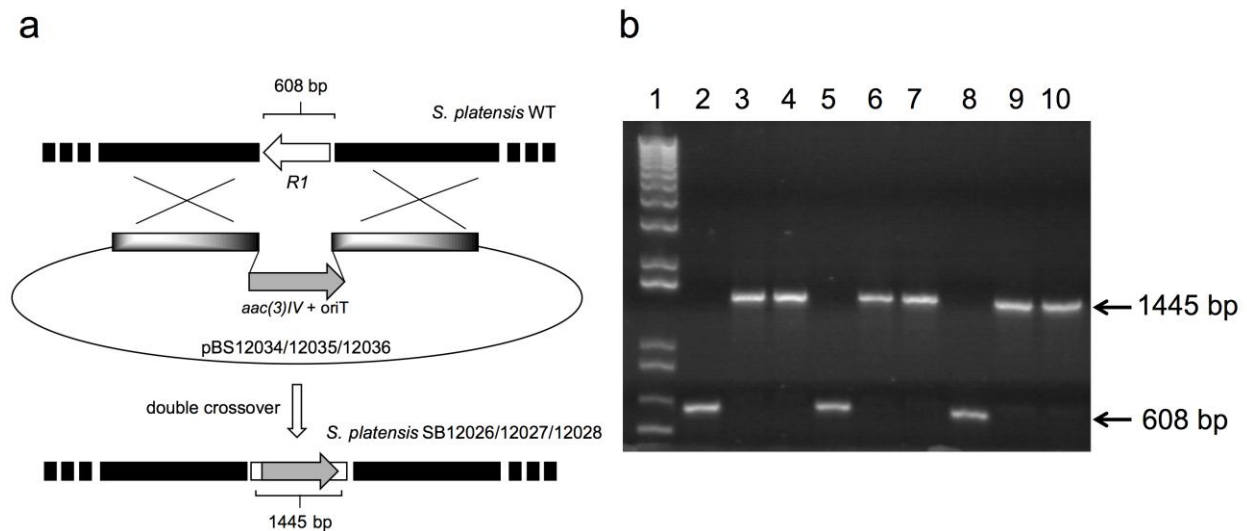

## References

- (1) Adekambi, T.; Butler, R. W.; Hanrahan, F.; Delcher, A. L.; Drancourt, M.; Shinnick, T. M. *PLoS One* **2011**, *6*, e14792.
- (2) MacNeil, D. J.; Gewain, K. M.; Ruby, C. L.; Dezeny, G.; Gibbons, P. H.; MacNeil, T. *Gene* **1992**, *111*, 61-68.
- (3) Gust, B.; Challis, G. L.; Fowler, K.; Kieser, T.; Chater, K. F. *Proc. Natl. Acad. Sci. USA* **2003**, *100*, 1541-1546.
- (4) Wang, J.; Soisson, S. M.; Young, K.; Shoop, W.; Kodali, S.; Galgoci, A.; Painter, R.; Parthasarathy, G.; Tang, Y. S.; Cummings, R.; Ha, S.; Dorso, K.; Motyl, M.; Jayasuriya, H.; Ondeyka, J.; Herath, K.; Zhang, C.; Hernandez, L.; Allocco, J.; Basilio, A.; Tormo, J. R.; Genilloud, O.; Vicente, F.; Pelaez, F.; Colwell, L.; Lee, S. H.; Michael, B.; Felcetto, T.; Gill, C.; Silver, L. L.; Hermes, J. D.; Bartizal, K.; Barrett, J.; Schmatz, D.; Becker, J. W.; Cully, D.; Singh, S. B. *Nature* **2006**, *441*, 358-361.
- (5) Singh, S. B.; Jayasuriya, H.; Ondeyka, J. G.; Herath, K. B.; Zhang, C.; Zink, D. L.; Tsou, N. N.; Ball, R. G.; Basilio, A.; Genilloud, O.; Diez, M. T.; Vicente, F.; Pelaez, F.; Young, K.; Wang, J. *J. Am. Chem. Soc.* **2006**, *128*, 11916-11920.
- (6) Jayasuriya, H.; Herath, K. B.; Zhang, C.; Zink, D. L.; Basilio, A.; Genilloud, O.; Diez, M. T.; Vicente, F.; Gonzalez, I.; Salazar, O.; Pelaez, F.; Cummings, R.; Ha, S.; Wang, J.; Singh, S. B. *Angew. Chem. Int. Ed.* **2007**, *46*, 4684-4688.
- (7) Wang, J.; Kodali, S.; Lee, S. H.; Galgoci, A.; Painter, R.; Dorso, K.; Racine, F.; Motyl, M.; Hernandez, L.; Tinney, E.; Colletti, S. L.; Herath, K.; Cummings, R.; Salazar, O.; Gonzalez, I.; Basilio, A.; Vicente, F.; Genilloud, O.; Pelaez, F.; Jayasuriya, H.; Young, K.; Cully, D. F.; Singh, S. B. *Proc. Natl. Acad. Sci. USA* **2007**, *104*, 7612-7616.
- (8) Smanski, M. J.; Peterson, R. M.; Rajska, S. R.; Shen, B. *Antimicrob. Agents Chemother.* **2009**, *53*, 1299-1304.
- (9) Yu, Z.; Smanski, M. J.; Peterson, R. M.; Marchillo, K.; Andes, D.; Rajska, S. R.; Shen, B. *Org. Lett.* **2010**, *12*, 1744-1747.
- (10) Smanski, M. J.; Yu, Z.; Casper, J.; Lin, S.; Peterson, R. M.; Chen, Y.; Wendt-Pienkowski, E.; Rajska, S. R.; Shen, B. *Proc. Natl. Acad. Sci. USA* **2011**, *108*, 13498-13503.
- (11) Larkin, M. A.; Blackshields, G.; Brown, N. P.; Chenna, R.; McGettigan, P. A.; McWilliam, H.; Valentin, F.; Wallace, I. M.; Wilm, A.; Lopez, R.; Thompson, J. D.; Gibson, T. J.; Higgins, D. G. *Bioinformatics* **2007**, *23*, 2947-2948.
